# Supplementary material for: Iminophosphorane-based [P2N2] rhodium complexes: synthesis, reactivity, and application in catalysed transfer hydrogenation of polar bonds
Source: Royal Society of Chemistry journal article supplement (doi:10.1039/c0nj00299b), 2010-01-01
Supplement: c0nj00299b.pdf [file c0nj00299b.pdf]

## Supplementary Information for

# Iminophosphorane based $[P_2N_2]$ rhodium complexes: synthesis, reactivity, and a catalytic application.

Antoine Buchard, Elina Payet, Audrey Auffrant,\* Xavier Le Goff, Pascal Le Floch\*

Ecole Polytechnique, Laboratoire Hétéroéléments et Coordination, CNRS UMR7653, route de Saclay, 91128 Palaiseau Cedex, France  
audrey.auffrant@polytechnique.edu

## Contents

|                                                                                                            |           |
|------------------------------------------------------------------------------------------------------------|-----------|
| Crystal data and structural refinement details for complexes <b>2-BF<sub>4</sub></b> and <b>3-Cl</b> ..... | <b>S2</b> |
| X-ray diffraction structure of complex <b>2-BF<sub>4</sub></b> (ORTEP plot).....                           | <b>S3</b> |
| X-ray diffraction structure of complex <b>3-Cl</b> (ORTEP plot).....                                       | <b>S3</b> |

**Table S1.** Crystal data and structural refinement details for complexes **2\_BF<sub>4</sub>** and **3\_Cl**

| Compound                                    | <b>2_BF<sub>4</sub></b>                                                                                                          | <b>3_Cl</b>                                                                                                                      |
|---------------------------------------------|----------------------------------------------------------------------------------------------------------------------------------|----------------------------------------------------------------------------------------------------------------------------------|
| Molecular formula                           | C <sub>52</sub> H <sub>48</sub> N <sub>2</sub> P <sub>4</sub> Rh <sub>2</sub> (CH <sub>2</sub> Cl <sub>2</sub> ),BF <sub>4</sub> | C <sub>52</sub> H <sub>48</sub> Cl <sub>2</sub> N <sub>2</sub> P <sub>4</sub> Rh <sub>2</sub> Cl,C <sub>2</sub> H <sub>3</sub> N |
| Molecular weight                            | 1184.38                                                                                                                          | 1221.55                                                                                                                          |
| Crystal habit                               | Pale Yellow Block                                                                                                                | Orange Needle                                                                                                                    |
| Crystal dimensions(mm)                      | 0.20x0.14x0.06                                                                                                                   | 0.32x0.04x0.04                                                                                                                   |
| Crystal system                              | orthorhombic                                                                                                                     | orthorhombic                                                                                                                     |
| Space group                                 | P2 <sub>1</sub> 2 <sub>1</sub> 2 <sub>1</sub>                                                                                    | P2 <sub>1</sub> 2 <sub>1</sub> 2                                                                                                 |
| a(Å)                                        | 12.299(1)                                                                                                                        | 19.416(1)                                                                                                                        |
| b(Å)                                        | 19.674(1)                                                                                                                        | 24.922(1)                                                                                                                        |
| c(Å)                                        | 22.075(1)                                                                                                                        | 10.803(1)                                                                                                                        |
| α(°)                                        | 90.00                                                                                                                            | 90.00                                                                                                                            |
| β(°)                                        | 90.00                                                                                                                            | 90.00                                                                                                                            |
| γ(°)                                        | 90.00                                                                                                                            | 90.00                                                                                                                            |
| V(Å <sup>3</sup> )                          | 5341.5(6)                                                                                                                        | 5227.4(6)                                                                                                                        |
| Z                                           | 4                                                                                                                                | 4                                                                                                                                |
| d(g·cm <sup>-3</sup> )                      | 1.473                                                                                                                            | 1.552                                                                                                                            |
| F(000)                                      | 2416                                                                                                                             | 2504                                                                                                                             |
| μ(cm <sup>-1</sup> )                        | 0.692                                                                                                                            | 0.799                                                                                                                            |
| Absorption corrections                      | multi-scan ;<br>0.8739 min, 0.9596 max                                                                                           | multi-scan ;<br>0.7841 min, 0.9687 max                                                                                           |
| λ(Å)                                        | 0.71069                                                                                                                          | 0.71069                                                                                                                          |
| Monochromator                               | graphite                                                                                                                         | graphite                                                                                                                         |
| T (K)                                       | 150.0(1)                                                                                                                         | 150.0(1)                                                                                                                         |
| Scan mode                                   | phi and omega scans                                                                                                              | phi and omega scans                                                                                                              |
| Maximum θ                                   | 30.02                                                                                                                            | 25.01                                                                                                                            |
| HKL ranges                                  | -17 10 ; -27 26 ; -22 31                                                                                                         | -22 22 ; -29 29 ; -12 12                                                                                                         |
| Reflections measured                        | 36847                                                                                                                            | 8882                                                                                                                             |
| Unique data                                 | 15419                                                                                                                            | 8882                                                                                                                             |
| Rint                                        | 0.0429                                                                                                                           | 0.1246                                                                                                                           |
| Reflections used                            | 12655                                                                                                                            | 5203                                                                                                                             |
| Criterion                                   | I > 2σ(I)                                                                                                                        | I > 2σ(I)                                                                                                                        |
| Refinement type                             | Fsqd                                                                                                                             | Fsqd                                                                                                                             |
| Hydrogen atoms                              | constr                                                                                                                           | mixed                                                                                                                            |
| Parameters refined                          | 631                                                                                                                              | 560                                                                                                                              |
| Reflections / parameter                     | 20                                                                                                                               | 9                                                                                                                                |
| wR2                                         | 0.0777                                                                                                                           | 0.1394                                                                                                                           |
| R1                                          | 0.0354                                                                                                                           | 0.0610                                                                                                                           |
| Flack's parameter                           | -0.045(15)                                                                                                                       | -0.10(5)                                                                                                                         |
| Weights a, b                                | 0.0328 ; 0.0000                                                                                                                  | 0.0595 ; 0.0000                                                                                                                  |
| GoF                                         | 0.993                                                                                                                            | 0.931                                                                                                                            |
| difference peak / hole (e Å <sup>-3</sup> ) | 0.680(0.066) / -0.679(0.066)                                                                                                     | 0.842(0.106) / -0.426(0.106)                                                                                                     |
| CCDC number                                 | 772852                                                                                                                           | 772854                                                                                                                           |

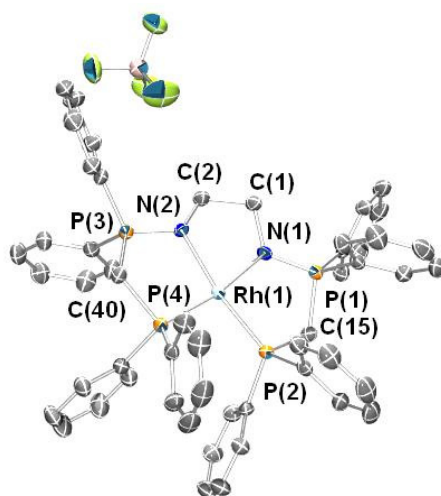

**Figure S1.** Molecular structure of complex **2\_BF<sub>4</sub>**. Thermal ellipsoids drawn at the 50% probability level. Hydrogen atoms have been omitted for clarity. Selected distances (Å) and angles (°): P2–Rh1 2.1937(6), N1–Rh1 2.091(2), N2–Rh1 2.095(2), P4–Rh1 2.1911(5), Rh1–B1 10.661, P1–N1 1.606(2), P3–N2 1.610(2), P1–C15 1.803(2), P2–C15 1.875(2), P3–C40 1.802(2), P4–C40 1.882(2); P4–Rh1–P2 100.28(2), N1–Rh1–N2 80.55(7), P4–Rh1–N2 89.78(5), P2–Rh1–N1 89.41(5), P1–N1–Rh1 117.6(1), P1–C15–P2 106.6(1), C15–P2–Rh1 104.80(7), C40–P4–Rh1 105.35(7), P4–C40–P3 107.5(1), N(2)–P(3)–C(40) 105.0(1), P3–N2–Rh1 117.2(1), N1–P2–P4–N2 -0.83(3), P1–P2–P4–P3 15.21(2), P2–N1–N2–P4 1.03(4), P2–P1–P3–P4 8.85(2).

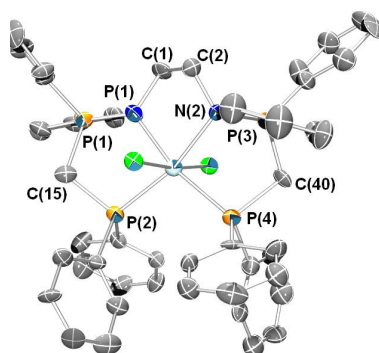

**Figure S2.** Molecular structure of complex **3\_BF<sub>4</sub>**. Thermal ellipsoids drawn at the 50% probability level. Hydrogen atoms have been omitted for clarity. Selected distances (Å) and angles (°): P2–Rh1 2.291(2), N1–Rh1 2.087(7), N2–Rh1 2.102(6), P4–Rh1 2.308(2), Rh1–Cl1 2.351(2), Rh1–Cl2 2.362(2), Rh1–Cl3 6.604, P1–N1 1.593(8), P3–N2 1.578(7), P1–C15 1.787(8), P2–C15 1.88(1), P3–C40 1.794(8), P4–C40 1.840(8); P4–Rh1–P2 105.66(8), N1–Rh1–N2 80.9(3), P4–Rh1–N2 86.9(2), P2–Rh1–N1 86.9(2), Cl1–Rh1–Cl2 173.56(8), Cl1–Rh1–P2 86.55(8), Cl1–Rh1–P4 96.34(8), Cl1–Rh1–N2 87.4(2), Cl1–Rh1–N1 87.0(2), Cl2–Rh1–P2 96.12(8), Cl2–Rh1–P4 88.60(8), Cl2–Rh1–N2 88.8(2), Cl2–Rh1–N1 87.3(2), P(3)–N(2)–Rh(1) 121.8(3); N(2)–P(3)–C(40) 104.2(4); C(40)–P(4)–Rh(1) 100.6(3); C(15)–P(2)–Rh(1) 101.9(3); N(1)–P(1)–C(15) 105.5(4); P(1)–N(1)–Rh(1) 122.8(4), P1–C15–P2 109.0(5), P4–C40–P3 109.6(4), N1–P2–P4–N2 5.31(17), P1–P2–P4–P3 5.40(11), P2–N1–N2–P4 7.16(44), P2–P1–P3–P4 3.39(9).
